# Table of Contents

## FEATURES

### *From the National Academies*

#### **Integrating Policy and Decision Making into Undergraduate Science Education**

Jay B. Labov and Nancy F. Huddleston .....347–352

### *Current Insights*

#### **Recent Research in Science Teaching and Learning**

Erin Dolan .....353–354

### *Educator Highlight*

#### **Marianne Bronner-Fraser**

Interviewed by Laura L. Mays Hoopes .....355–356

### *Book Review*

#### **Matters of Life and Death: A Cellular Tour Informed by Basic Research**

Karen Kalumuck .....357–358

### *Book Review*

#### **In the Company of Geneticists**

José Vázquez .....359–360

## ARTICLES

#### **A Delicate Balance: Integrating Active Learning into a Large Lecture Course**

J. D. Walker, Sehoya H. Cotner, Paul M. Baepler, and Mark D. Decker .....361–367

#### **Biology in Bloom: Implementing Bloom’s Taxonomy to Enhance Student Learning in Biology**

Alison Crowe, Clarissa Dirks, and Mary Pat Wenderoth .....368–381

#### **Investigative Cases and Student Outcomes in an Upper-Division Cell and Molecular Biology Laboratory Course at a Minority-serving Institution**

Jonathan D. Knight, Rebecca M. Fulop, Leticia Márquez-Magaña, and Kimberly D. Tanner .....382–393

#### **Encouraging Minority Undergraduates to Choose Science Careers: Career Paths Survey Results**

Merna Villarejo, Amy E. L. Barlow, Deborah Kogan, Brian D. Veazey, and Jennifer K. Sweeney .....394–409

#### **A Molecular Genetics Laboratory Course Applying Bioinformatics and Cell Biology in the Context of Original Research**

Cynthia J. Brame, Wendy M. Pruitt, and Lucy C. Robinson .....410–421

#### **The Genetics Concept Assessment: A New Concept Inventory for Gauging Student Understanding of Genetics**

Michelle K. Smith, William B. Wood, and Jennifer K. Knight .....422–430

### *On the Cover*

Still graphic from a video on newt mitosis (created by Jeremy and Julianne Pickett-Heaps, University of Melbourne, Australia). It is one of many visuals and other educational resources recently made available on the BioEDUCATE (<http://bioeducate.ascb.org>) website—an open-access Web resource provided by the American Society for Cell Biology.
